# Supplementary material
Source: PubMed Central journal article supplement (PMC4538126)
Supplement: ijcem0008-10187-f9.pdf [file ijcem0008-10187-f9.pdf]

## VDR polymorphisms and tuberculosis susceptibility

**Table S1.** Meta-regression analysis results

|                          | N  | t vs. T        |      | tt vs. TT     |      | tt vs. Tt + TT |      | Tt vs. TT     |      | tt + Tt vs. TT |      |
|--------------------------|----|----------------|------|---------------|------|----------------|------|---------------|------|----------------|------|
|                          |    | 95% CI         | P    | 95% CI        | P    | 95% CI         | P    | 95% CI        | P    | OR             | P    |
| Publication years        | 38 | -50, 82, 23.22 | 0.45 | -87.42, 38.08 | 0.43 | -83.56, 40.63  | 0.49 | -52.32, 27.24 | 0.53 | -50.82, 23.22  | 0.45 |
| Ethnicities              | 38 | -0.33, 0.58    | 0.58 | -1.11, 0.70   | 0.65 | -1.11, 0.70    | 0.65 | -0.27, 0.68   | 0.39 | -0.33, 0.58    | 0.58 |
| Sample size              | 38 | -0.05, 0.19    | 0.27 | -0.12, 0.31   | 0.38 | -0.13, 0.30    | 0.43 | -0.06, 0.20   | 0.27 | -0.05, 0.19    | 0.27 |
| Genotyping method        | 38 | -0.07, 0.12    | 0.60 | -0.07, 0.26   | 0.26 | -0.08, 0.25    | 0.29 | -0.08, 0.11   | 0.77 | -0.07, 0.12    | 0.60 |
| Source of controls       | 38 | -0.15, 0.20    | 0.75 | -0.30, 0.40   | 0.77 | -0.30, 0.40    | 0.77 | -0.16, 0.20   | 0.81 | -0.15, 0.20    | 0.75 |
| HWE                      | 38 | -0.07, 0.10    | 0.75 | -0.15, 0.17   | 0.89 | -0.16, 0.16    | 0.94 | -0.07, 0.11   | 0.67 | -0.07, 0.10    | 0.75 |
| The type of tuberculosis | 38 | -0.16, 0.28    | 0.59 | -0.36, 0.56   | 0.67 | -0.36, 0.56    | 0.67 | -0.18, 0.28   | 0.67 | -0.16, 0.28    | 0.59 |

**Table S2.** Sensitivity analyses of study with controls not in HWE excluded

|                       | N  | t vs. T                        |                                                  | tt vs. TT                        |                                                  | tt vs. Tt + TT                   |                                                  | Tt vs. TT                        |                                                  | tt + Tt vs. TT                   |                                                  |
|-----------------------|----|--------------------------------|--------------------------------------------------|----------------------------------|--------------------------------------------------|----------------------------------|--------------------------------------------------|----------------------------------|--------------------------------------------------|----------------------------------|--------------------------------------------------|
|                       |    | OR (95% CI)                    | Heterogeneity (I <sup>2</sup> , P <sub>Q</sub> ) | OR (95% CI)                      | Heterogeneity (I <sup>2</sup> , P <sub>Q</sub> ) | OR (95% CI)                      | Heterogeneity (I <sup>2</sup> , P <sub>Q</sub> ) | OR (95% CI)                      | Heterogeneity (I <sup>2</sup> , P <sub>Q</sub> ) | OR (95% CI)                      | Heterogeneity (I <sup>2</sup> , P <sub>Q</sub> ) |
| Total                 | 38 | 1.05 (0.94, 1.17)              | 54.9%; 0.000                                     | 1.14 (0.87, 1.48)                | 53.9%, 0.000                                     | 0.97 (0.84, 1.12) <sup>F</sup>   | 43.3%, 0.008                                     | 1.05 (0.96, 1.15) <sup>F</sup>   | 34.9%, 0.034                                     | 1.04 (0.95, 1.13) <sup>F</sup>   | 45.1%, 0.005                                     |
| Ethnicities           |    |                                |                                                  |                                  |                                                  |                                  |                                                  |                                  |                                                  |                                  |                                                  |
| ES Asians             | 7  | 0.97 (0.77, 1.22) <sup>F</sup> | 0%; 0.541                                        | 1.10 (0.49, 2.48) <sup>F</sup>   | 0%, 0.997                                        | 1.09 (0.48, 2.44) <sup>F</sup>   | 0%, 0.993                                        | 0.94 (0.73, 1.22) <sup>F</sup>   | 23.2%, 0.252                                     | 0.96 (0.75, 1.23) <sup>F</sup>   | 8.9%, 0.361                                      |
| SW Asians             | 11 | 1.33 (1.04, 1.72) <sup>+</sup> | 70.4%; 0.000                                     | 1.72 (1.03, 2.86) <sup>*F</sup>  | 65.4%, 0.001                                     | 1.40 (1.08, 1.82) <sup>+,F</sup> | 46.2%, 0.046                                     | 1.29 (1.06, 1.56) <sup>+,F</sup> | 40.3%, 0.080                                     | 1.41 (1.03, 1.91) <sup>+</sup>   | 61.6%, 0.004                                     |
| Africans              | 8  | 0.95 (0.87, 1.03) <sup>F</sup> | 0%; 0.432                                        | 0.86 (0.64, 1.16)                | 51.2%, 0.045                                     | 0.86 (0.64, 1.15)                | 51.9%, 0.042                                     | 0.98 (0.88, 1.10) <sup>F</sup>   | 0%, 0.927                                        | 0.96 (0.86, 1.07) <sup>F</sup>   | 0%, 0.884                                        |
| Americans             | 1  | 0.59 (0.28, 1.22)              | -                                                | 0.62 (0.03, 15.48) <sup>F</sup>  | -                                                | 0.67 (0.03, 16.47) <sup>F</sup>  | -                                                | 0.91 (0.43, 1.91) <sup>F</sup>   | -                                                | 0.59 (0.28, 1.25) <sup>F</sup>   | -                                                |
| Europeans             | 2  | 0.94 (0.70, 1.27) <sup>F</sup> | 0%; 0.894                                        | 0.32 (0.03, 3.85)                | 66.2%, 0.086                                     | 0.20 (0.01, 6.66)                | 82.5%, 0.017                                     | 1.70 (0.61, 4.74)                | 79.9%, 0.026                                     | 1.39 (0.66, 2.95)                | 65.1%, 0.091                                     |
| Sample size           |    |                                |                                                  |                                  |                                                  |                                  |                                                  |                                  |                                                  |                                  |                                                  |
| Large <sup>a</sup>    | 7  | 0.93 (0.85, 1.01) <sup>F</sup> | 11.8%; 0.339                                     | 0.81 (0.65, 1.01) <sup>F</sup>   | 47.9%, 0.074                                     | 0.82 (0.67, 1.02) <sup>F</sup>   | 49.6%, 0.064                                     | 0.96 (0.85, 1.08) <sup>F</sup>   | 0%, 0.971                                        | 0.93 (0.84, 1.04) <sup>F</sup>   | 0%, 0.849                                        |
| Small <sup>b</sup>    | 22 | 1.14 (0.97, 1.33)              | 54.3%; 0.001                                     | 1.28 (1.04, 1.59) <sup>*,F</sup> | 48.7%, 0.007                                     | 1.13 (0.92, 1.38) <sup>*,F</sup> | 34.9%, 0.059                                     | 1.18 (1.03, 1.36) <sup>*,F</sup> | 42.9%, 0.018                                     | 1.19 (1.05, 1.35) <sup>*,F</sup> | 49.0%, 0.005                                     |
| Genotyping method     |    |                                |                                                  |                                  |                                                  |                                  |                                                  |                                  |                                                  |                                  |                                                  |
| PCR-RFLP              | 20 | 1.11 (0.96, 1.29)              | 62.4%; 0.000                                     | 1.30 (0.95, 1.79)                | 53.1%, 0.003                                     | 1.15 (0.96, 1.37) <sup>F</sup>   | 31.7%, 0.092                                     | 1.06 (0.95, 1.19) <sup>F</sup>   | 34.3%, 0.067                                     | 1.11 (0.94, 1.32)                | 52.3%, 0.003                                     |
| Other methods         | 9  | 0.92 (0.83, 1.03) <sup>F</sup> | 0%; 0.594                                        | 0.73 (0.56, 0.95) <sup>*,F</sup> | 36.6%, 0.126                                     | 0.69 (0.54, 0.90) <sup>*,F</sup> | 45.6%, 0.065                                     | 1.03 (0.89, 1.19) <sup>F</sup>   | 42.8%, 0.082                                     | 0.97 (0.85, 1.12) <sup>F</sup>   | 19.4%, 0.270                                     |
| Source of controls    |    |                                |                                                  |                                  |                                                  |                                  |                                                  |                                  |                                                  |                                  |                                                  |
| Contacts <sup>c</sup> | 10 | 1.03 (0.90, 1.18) <sup>F</sup> | 0.0%; 0.674                                      | 1.15 (0.83, 1.60) <sup>F</sup>   | 0%, 0.927                                        | 1.09 (0.79, 1.49) <sup>F</sup>   | 0%, 0.915                                        | 1.01 (0.85, 1.21) <sup>F</sup>   | 0%, 0.591                                        | 1.03 (0.86, 1.22) <sup>F</sup>   | 0%, 0.620                                        |
| Healthy <sup>d</sup>  | 19 | 1.08 (0.93, 1.25)              | 67.5%; 0.000                                     | 1.20 (0.84, 1.73)                | 67.4%, 0.000                                     | 1.07 (0.79, 1.46)                | 59%, 0.001                                       | 1.06 (0.96, 1.17) <sup>F</sup>   | 49.2%, 0.008                                     | 1.11 (0.94, 1.32)                | 58.9%, 0.001                                     |
| Tuberculosis type     |    |                                |                                                  |                                  |                                                  |                                  |                                                  |                                  |                                                  |                                  |                                                  |
| pulmonary             | 21 | 1.00 (0.93, 1.07)              | 62.4%; 0.000                                     | 1.16 (0.83, 1.60)                | 61.5%, 0.000                                     | 1.05 (0.79, 1.38)                | 51.4%, 0.004                                     | 1.04 (0.94, 1.15) <sup>F</sup>   | 47.7%, 0.008                                     | 1.08 (0.92, 1.27)                | 55.2%, 0.001                                     |
| Extra and pulmonary   | 6  | 1.13 (0.95, 1.33) <sup>F</sup> | 30%; 0.21                                        | 1.29 (0.84, 1.96) <sup>F</sup>   | 39.6%, 0.141                                     | 1.22 (0.81, 1.82) <sup>F</sup>   | 35.7%, 0.169                                     | 1.12 (0.90, 1.39) <sup>F</sup>   | 0%, 0.545                                        | 1.14 (0.93, 1.41) <sup>F</sup>   | 0.9%, 0.410                                      |
| extra                 | 2  | 0.97 (0.70, 1.36) <sup>F</sup> | 0%; 0.855                                        | 1.00 (0.49, 2.04) <sup>F</sup>   | 0%, 0.876                                        | 1.06 (0.55, 2.06) <sup>F</sup>   | 0%, 0.915                                        | 0.90 (0.55, 1.46) <sup>F</sup>   | 0%, 0.873                                        | 0.92 (0.58, 1.46) <sup>F</sup>   | 0%, 0.855                                        |

Abbreviations: N: number of studies included; OR: odds ratio; Ph: p value for heterogeneity; P<sub>Q</sub>: Cochran's Q statistics; I<sup>2</sup>: Higgin's I<sup>2</sup> statistics. F: Results derived using Fixed effects for analysis. Random effects were used for all other calculations. \*OR with statistical significance; a: studies with more than 500 participants; b: studies with less than 5000 participants; c: studies with controls from patient contacts; d: studies with controls from healthy person.
